# Supplementary material for: Facile preparation and processing of aqueous dispersions of tris(8-hydroxyquinoline) aluminium(iii) photoluminescent nanoparticles
Source: Royal Society of Chemistry journal article supplement (doi:10.1039/b903837j), 2009-01-01
Supplement: b903837j.pdf [file b903837j.pdf]

## Facile preparation and processing of aqueous dispersions of tris(8-hydroxyquinoline) aluminium(III) photoluminescent nanoparticles\*

By *Andrew Michael Collins, Sam Olof, John Mitchels and Stephen Mann*

[\*] Prof. S. Mann, Dr A. M. Collins, S. Olof, and J. Mitchels,

Centre for Organized Matter Chemistry, School of Chemistry, University of Bristol, Bristol, BS8 1TS, UK

e-mail: [s.mann@bristol.ac.uk](mailto:s.mann@bristol.ac.uk)

### Supplementary Information

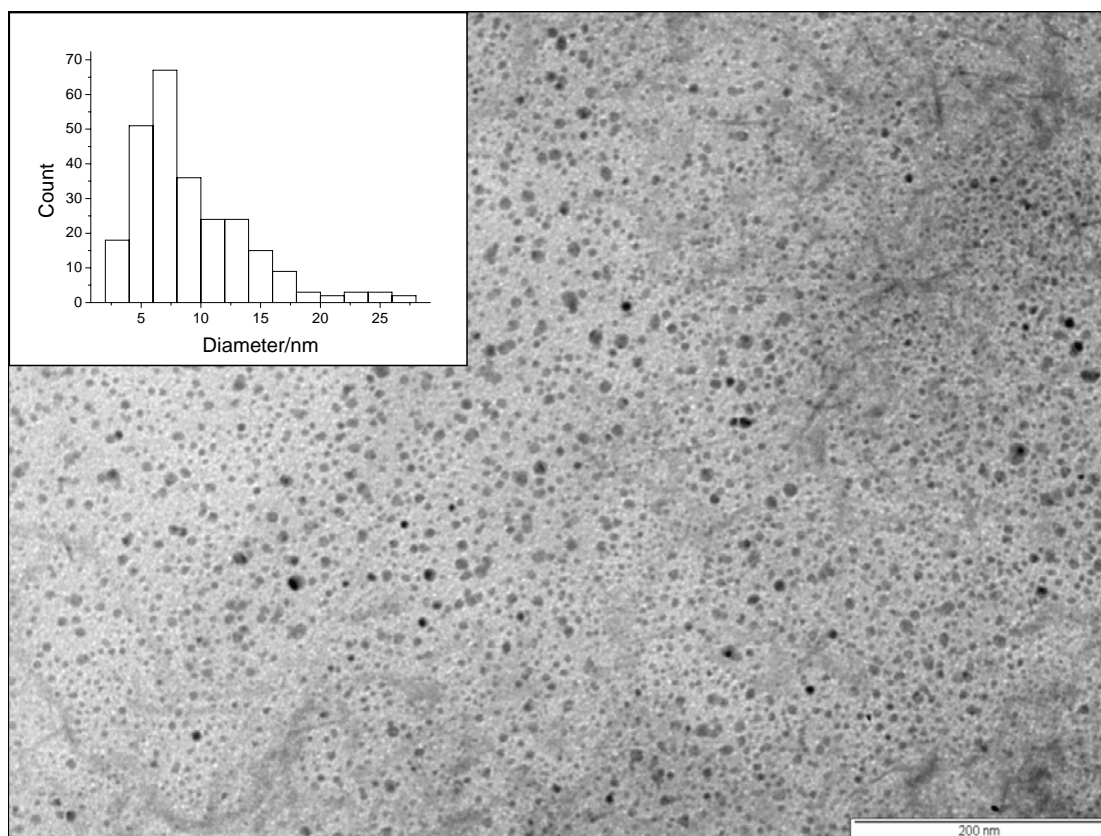

**Supplementary Figure S1:** TEM image of CTAB-stabilized Alq3 aqueous nanoparticles prepared by microwave-induced evaporation. Inset: corresponding particle size distribution histogram; mean = 9.2 nm,  $\sigma = 4.7$  nm ( $n = 257$ ).

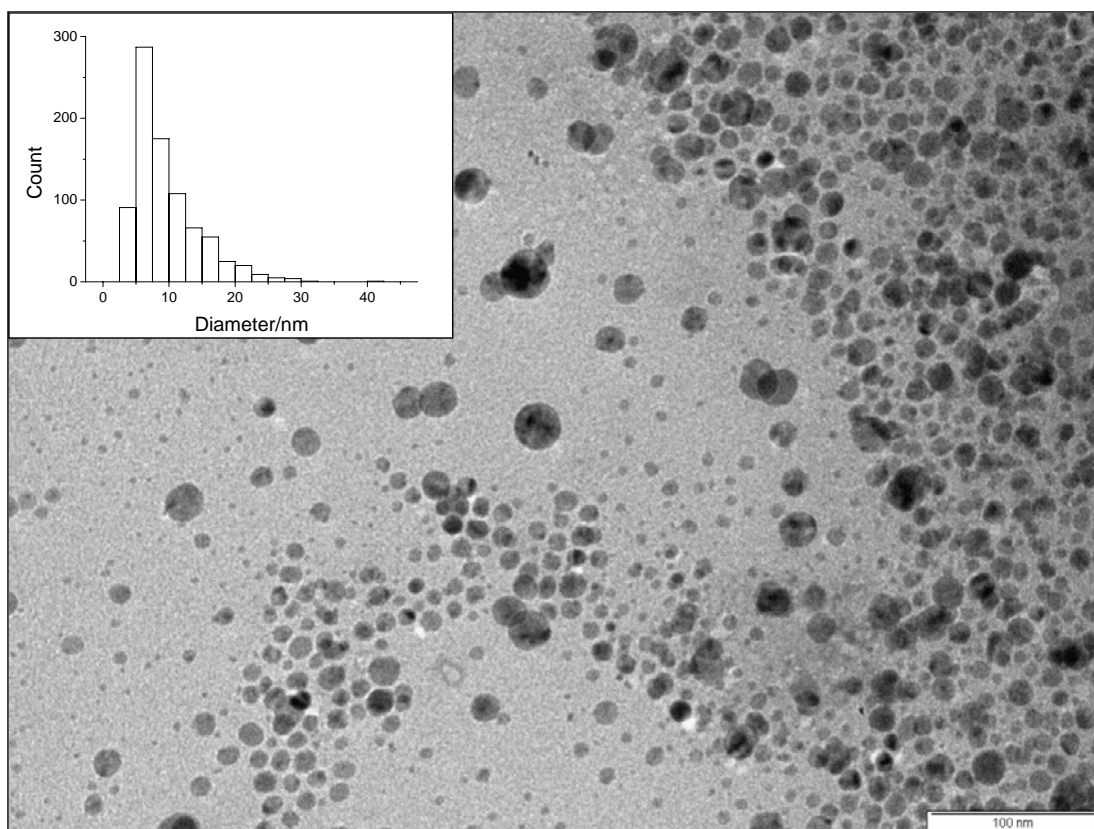

**Supplementary Figure S2:** TEM image of CTAB-stabilized Alq3 nanoparticles prepared by sonication-induced evaporation. Inset shows corresponding particle size distribution histogram. Mean = 9.5 nm  $\sigma$  = 4.9 nm (n = 847)

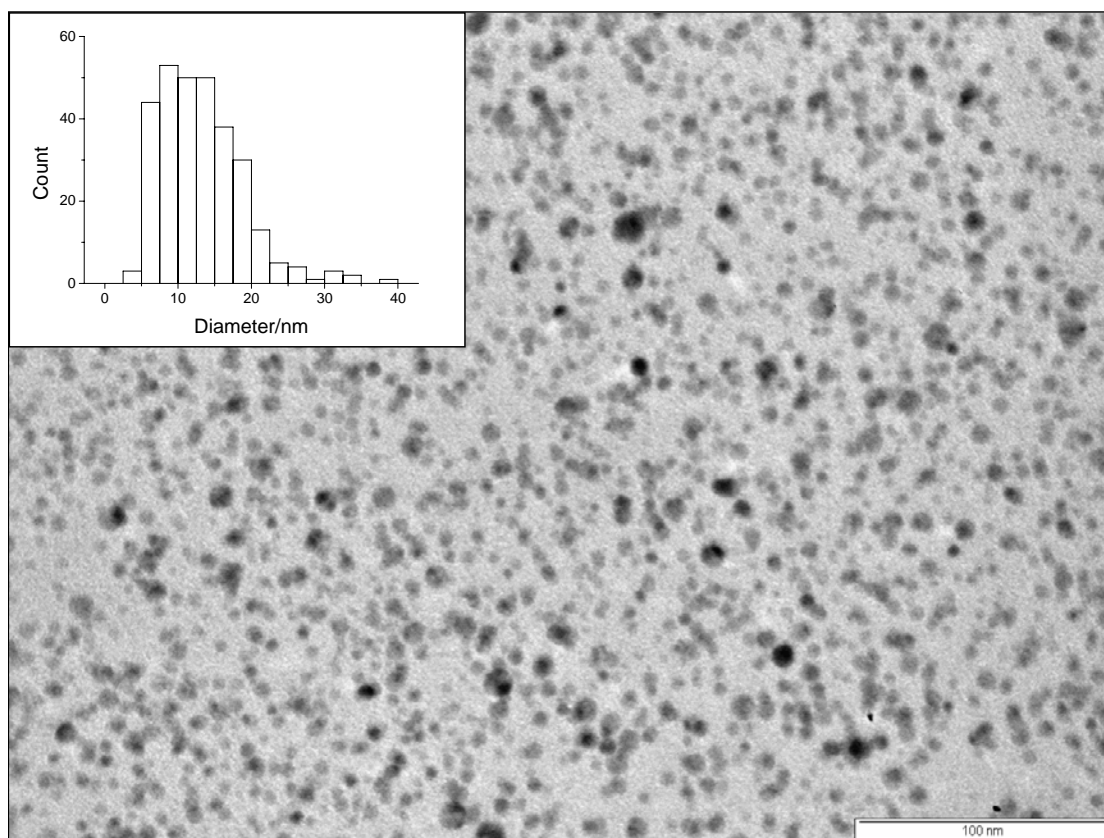

**Supplementary Figure S3** TEM image of SDS-stabilized Alq3 nanoparticles prepared by microwave-induced evaporation. Inset shows corresponding particle size distribution histogram. Mean = 13.1 nm  $\sigma$  = 5.7 nm n = 297
